# Supplementary material
Source: PubMed Central journal article supplement (PMC7308057)
Supplement: jciinsight-5-138999-s213.pdf [file jciinsight-5-138999-s213.pdf]

SUPPLEMENTAL MATERIAL

**Neutrophil extracellular traps in COVID-19**

*Zuo et al.*

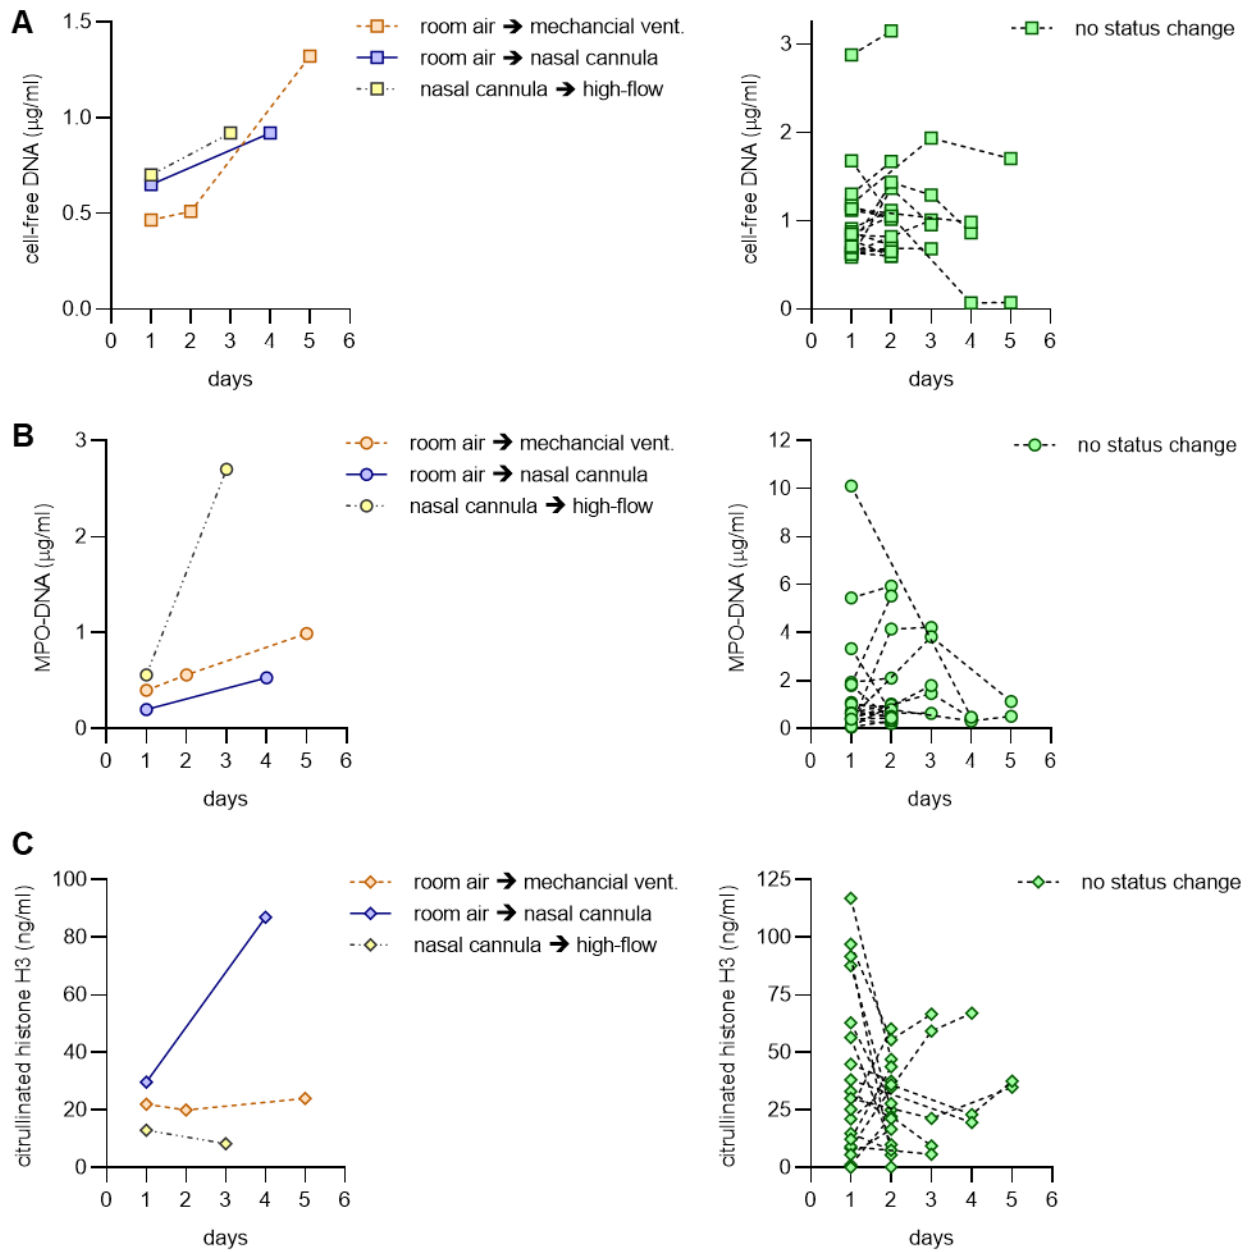

**Supplemental Figure 1: Markers of NETs in longitudinal serum samples.** For 22 patients, serum samples were available from multiple days. Data are plotted here for cell-free DNA (**A**), myeloperoxidase (MPO)-DNA complexes (**B**), and citrullinated histone H3 (**C**). “No status change” indicates no major change in oxygen requirement. As an example, a patient transitioning from room air to nasal-cannula oxygen *would* be considered to have had a status change.

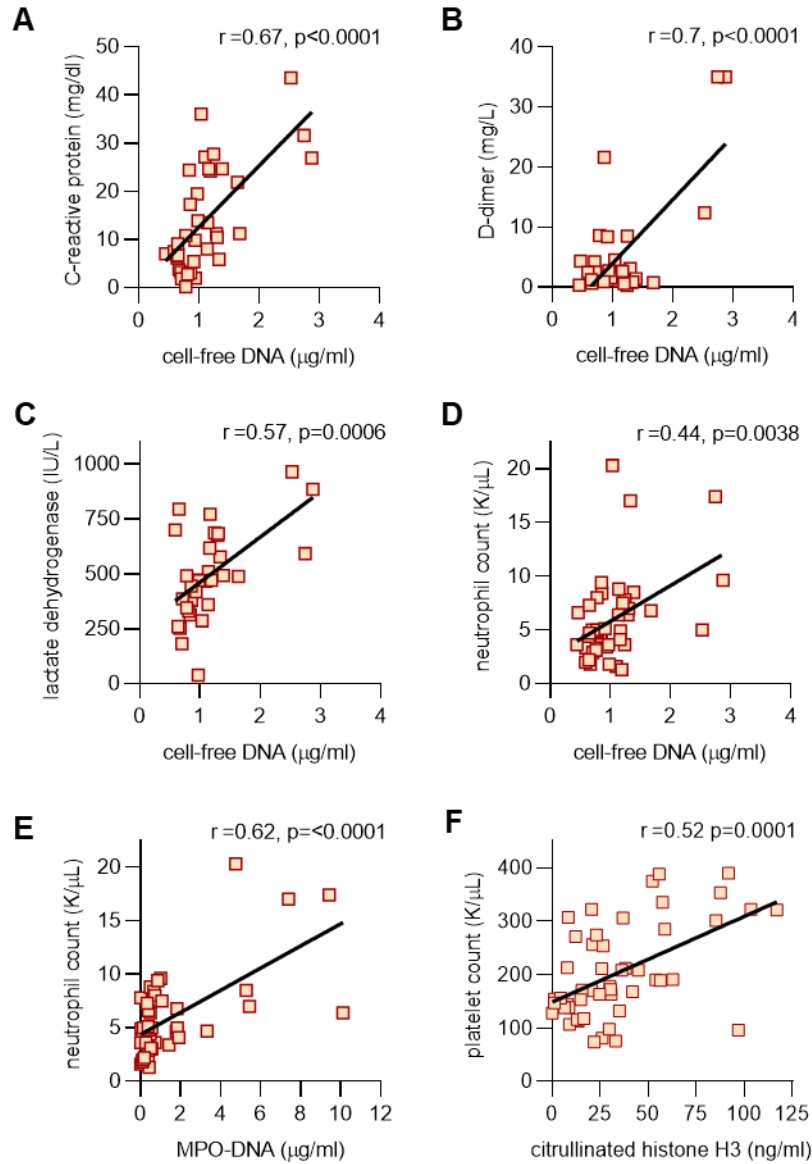

**Supplemental Figure 2: Association between NETs and clinical biomarkers with longitudinal data removed.** Cell-free DNA was compared to clinical laboratory results (when available on the same day), and correlation coefficients were calculated for C-reactive protein (**A**, n=36), D-dimer (**B**, n=31), lactate dehydrogenase (**C**, n=32), and absolute neutrophil count (**D**, n=42). In panel **E** (n=42), MPO-DNA was compared to absolute neutrophil count and in **F** (n=49), citrullinated histone H3 was compared to platelet count. Pearson's correlation coefficients were calculated and are shown in the panels. No patient was included in this analysis more than once.

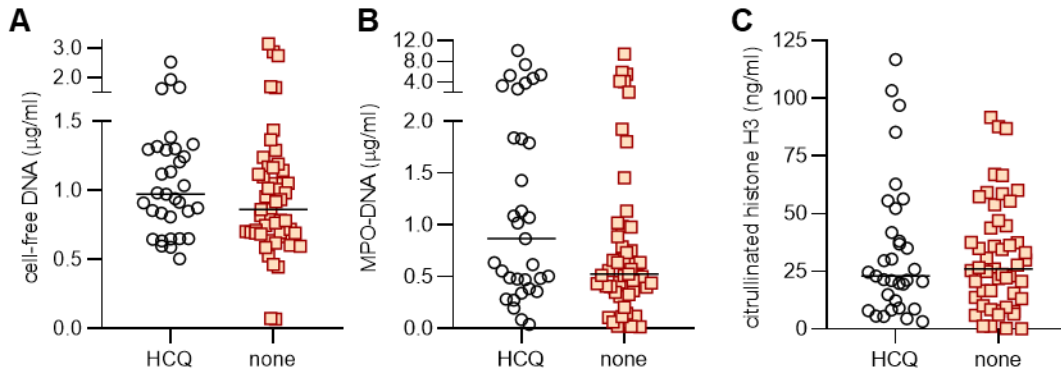

**Supplemental Figure 3: Impact of hydroxychloroquine (HCQ) on NETs.** Serum samples were grouped by HCQ treatment status (n=33 HCQ versus n=51 none) on the day of sample collection. Data are presented for cell-free DNA (**A**), myeloperoxidase (MPO)-DNA (**B**), and citrullinated histone H3 (**C**). No comparisons were statistically significant by either t test or Mann-Whitney test.
